# Supplementary material for: Two-dimensional type-II XSi2P4/MoTe2 (X = Mo, W) van der Waals heterostructures with tunable electronic and optical properties
Source: Royal Society of Chemistry journal article supplement (doi:10.1039/d2nj03809a), 2022-01-01
Supplement: d2nj03809a1.pdf [file d2nj03809a1.pdf]

## Two-dimensional type-II $\text{XSi}_2\text{P}_4/\text{MoTe}_2$ ( $\text{X}=\text{Mo}, \text{W}$ ) van der Waals heterostructures with tunable electronic and optical properties

Qingqing Luo<sup>a</sup>, Shaoqian Yin<sup>a,\*</sup>, Xiaoxin Sun<sup>a</sup>, Yanan Tang<sup>b</sup>, Zhen Feng<sup>c</sup>, and Xianqi Dai<sup>a,\*</sup>

<sup>a</sup> School of Physics, Henan Normal University, Xinxiang, Henan 453007, China.

<sup>b</sup> School of Physics and Electronic Engineering, Zhengzhou Normal University, Zhengzhou, Henan 450044, China.

<sup>c</sup> School of Materials Science and Engineering, Henan Engineering Research Center for Modification Technology of Metal Materials, Henan Institute of Technology, Xinxiang, Henan 453000, China

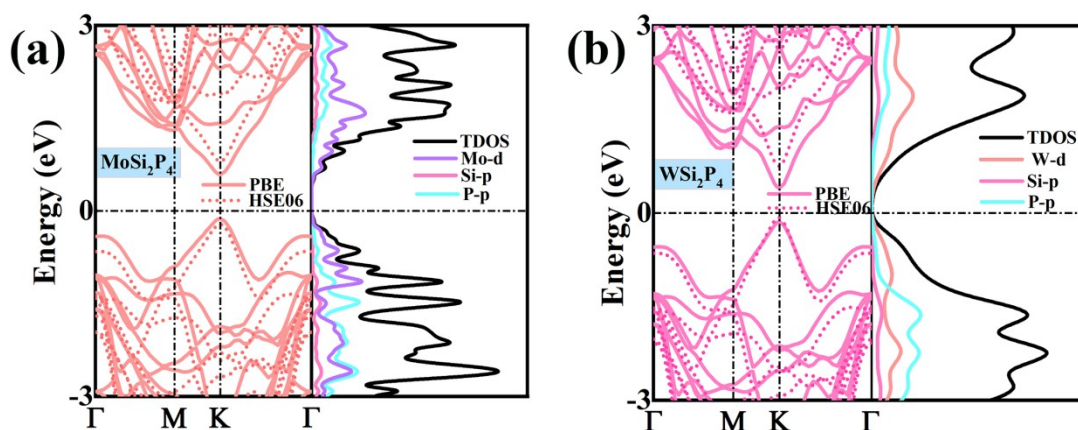

Fig. S1. The band structures and corresponding PDOS for  $\text{MoSi}_2\text{P}_4$  and  $\text{WSi}_2\text{P}_4$  monolayers

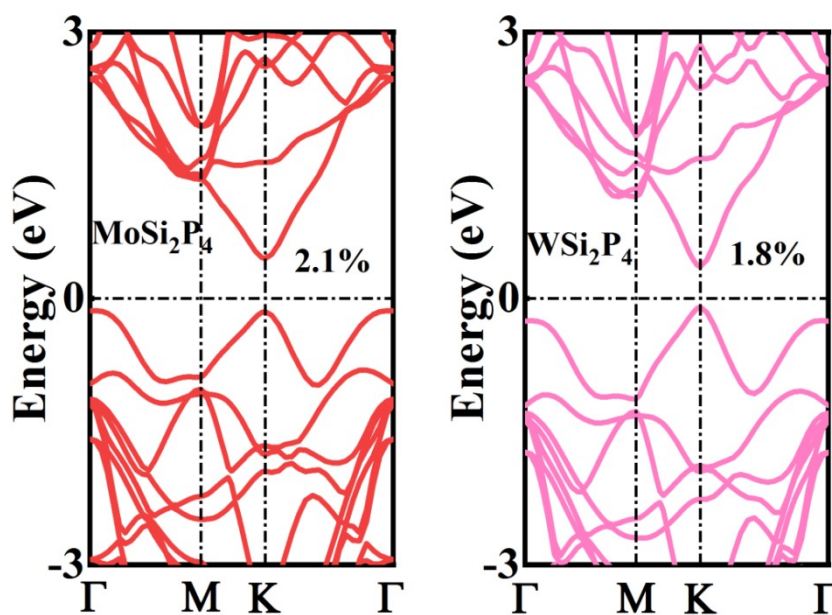

Fig. S2. Calculated the band structures of  $\text{MoSi}_2\text{P}_4/\text{WSi}_2\text{P}_4$  under tensile 2.1% /1.8%

\* Address correspondence to E-mail: [ysq@htu.edu.cn](mailto:ysq@htu.edu.cn) (Shaoqian Yin), [xqdai@htu.edu.cn](mailto:xqdai@htu.edu.cn) (Xianqi Dai)

**Table S1**

Calculated the binding energy  $E_b$  (eV) and cohesive energy  $E_{coh}$  (eV) of different models for the  $\text{MoSi}_2\text{P}_4/\text{MoTe}_2$  and  $\text{WSi}_2\text{P}_4/\text{MoTe}_2$  heterostructures

|                | A1     | A2     | A3     | A4     | A5     |
|----------------|--------|--------|--------|--------|--------|
| $E_b$ (eV)     | -0.254 | -0.241 | -0.177 | -0.173 | -0.270 |
| $E_{coh}$ (eV) | -5.512 | -5.511 | -5.504 | -5.504 | -5.514 |
|                | B1     | B2     | B3     | B4     | B5     |
| $E_b$ (eV)     | -0.298 | -0.218 | -0.218 | -0.220 | -0.361 |
| $E_{coh}$ (eV) | -4.766 | -4.758 | -4.758 | -4.756 | -4.767 |

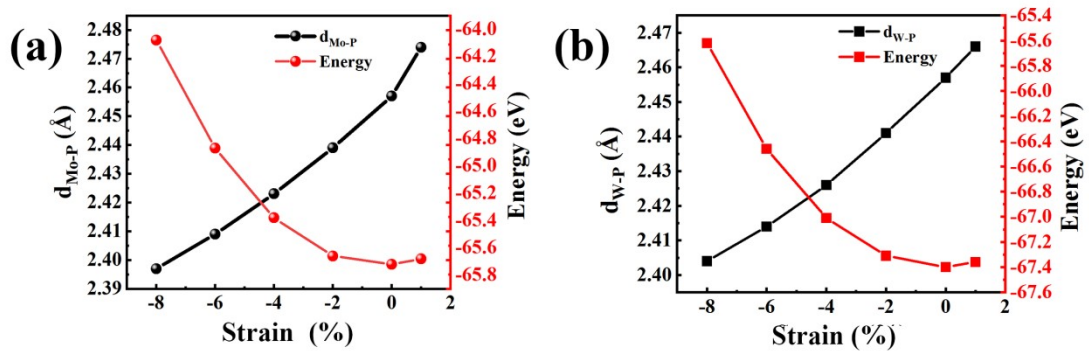

**Fig. S3.** The bond lengths ( $d_{\text{Mo-P}}$  and  $d_{\text{W-P}}$ ) and total energies under different strains for the (a)  $\text{MoSi}_2\text{P}_4/\text{WSi}_2\text{P}_4$  and (b)  $\text{WSi}_2\text{P}_4/\text{WSi}_2\text{P}_4$  heterostructures.

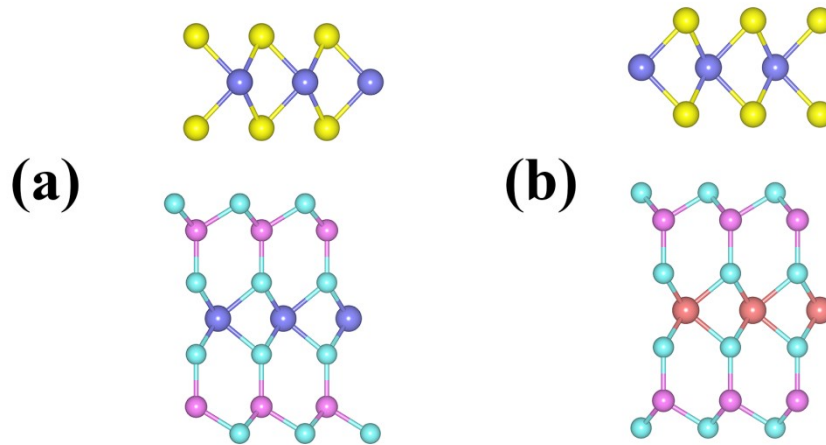

**Fig. S4.** The optimized structures of (a)  $\text{MoSi}_2\text{P}_4/\text{MoTe}_2$  heterostructure and (b)  $\text{WSi}_2\text{P}_4/\text{MoTe}_2$  heterostructure under biaxial strain  $\epsilon = -9\%$ . (Where the purple, watermelon red, pink, cyan and yellow spheres represent the Mo, W, Si, P and Se elements, respectively).

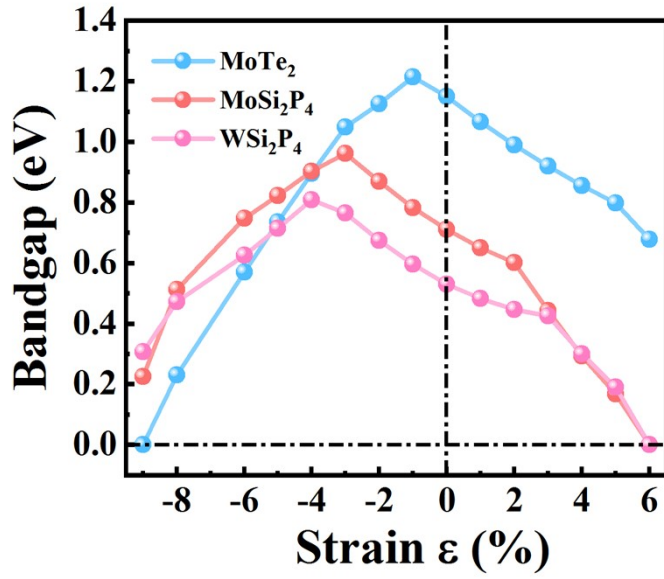

Fig. S5. The bandgap as of MoSi<sub>2</sub>P<sub>4</sub>, WSi<sub>2</sub>P<sub>4</sub> and MoTe<sub>2</sub> as functions with various biaxial strains

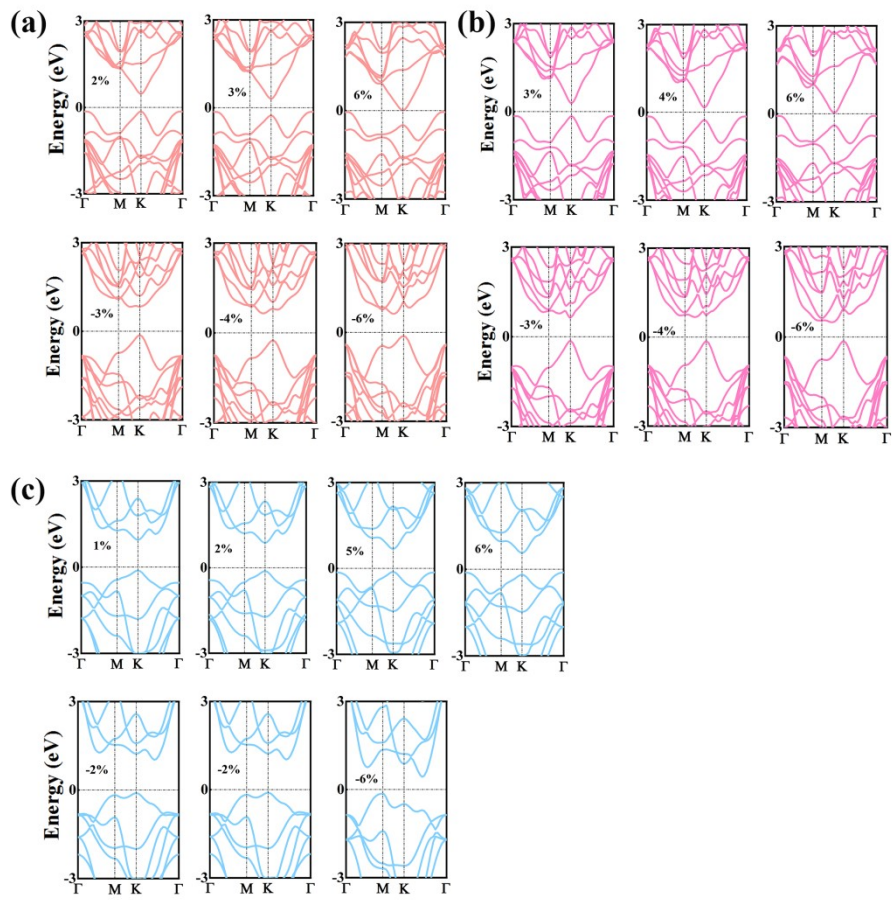

**Fig. S6.** The band structures of (a)  $\text{MoSi}_2\text{P}_4$ , (b)  $\text{WSi}_2\text{P}_4$  and (c)  $\text{MoTe}_2$  under different strains

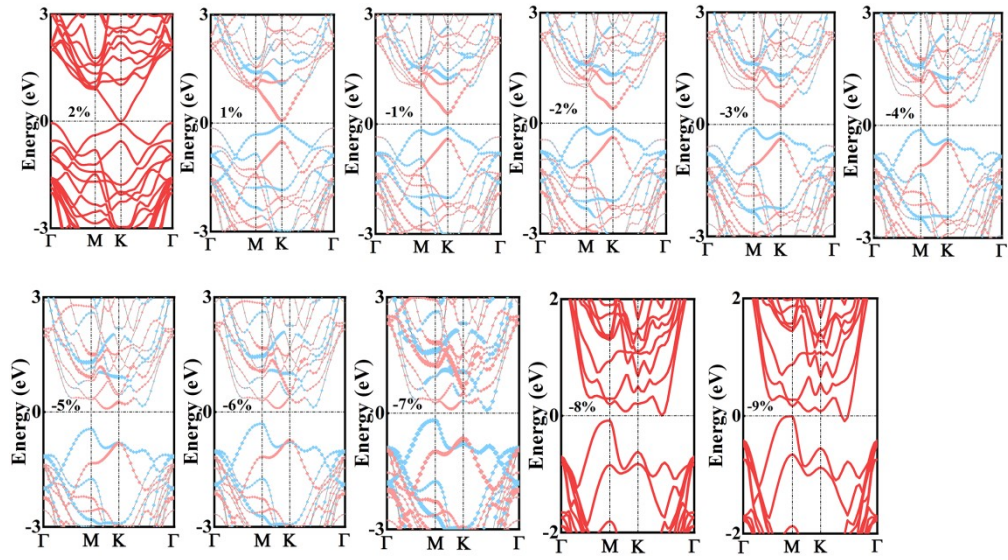

Fig. S7. The projected band structures of the  $\text{MoSi}_2\text{P}_4/\text{MoTe}_2$  vdWHs under different biaxial strains

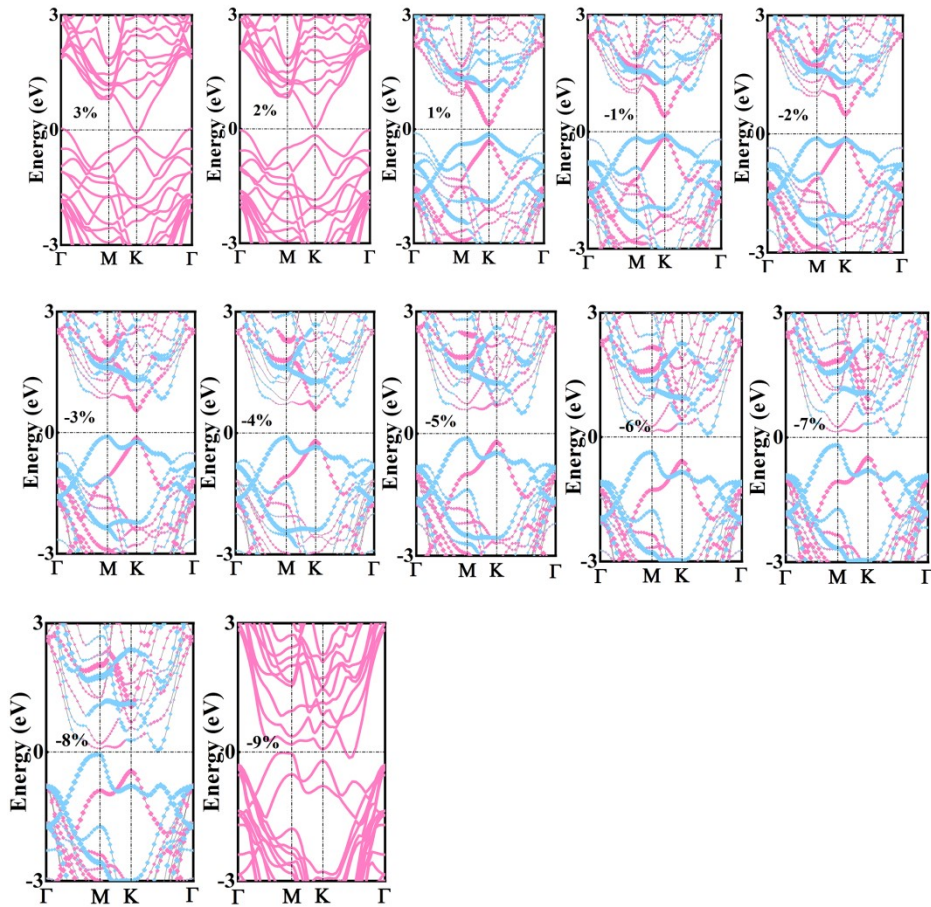

Fig. S8. The projected band structures of the  $\text{WSi}_2\text{P}_4/\text{MoTe}_2$  vdWHs under different biaxial strains

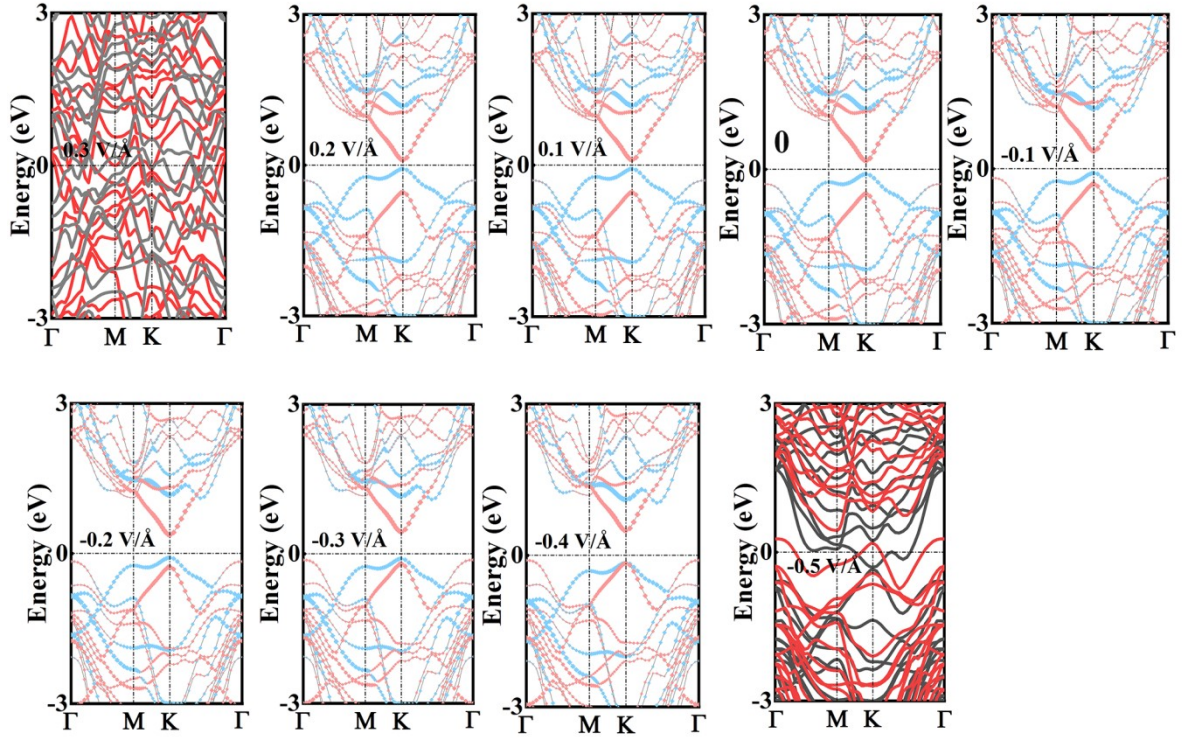

Fig. S9. The projected band structures of the MoSi<sub>2</sub>P<sub>4</sub>/MoTe<sub>2</sub> vdWHs under different external electric fields

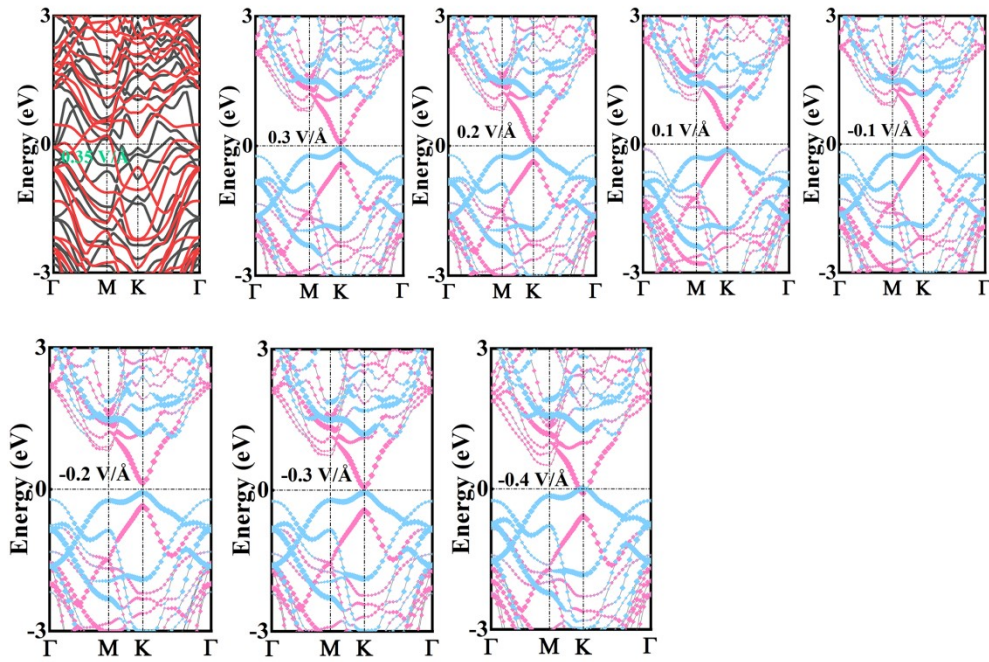

Fig. S10. The projected band structures of the WSi<sub>2</sub>P<sub>4</sub>/MoTe<sub>2</sub> vdWHs under different external electric fields
